# Supplementary material
Source: publisher site journal article supplement (https://www.dovepress.com/get_supplementary_file.php?f=366653.docx)
Supplement: Supplementary file 1 [file get_supplementary_file.php]

| **Cases** | **Clinical indications** | **Patients’ age** | **Referring department** |
| --- | --- | --- | --- |
| 1 | LBP, left radiculopathy, stenosis on previous MRI 2016. | 47 | Orthopaedics |
| 2 | Burning paraesthesia in both feet, normal reflexes, normal vibration sense. | 82 | Neurology |
| 3 | Progressively getting worse. Fracture L1 vertebra previously. Stooped gait, ? any further vertebral fractures ? spinal canal stenosis. | 73 | Anaesthesia |
| 4 | MRI brain and whole spine to assess if any new lesions prior to next OPD. Clinically stable. Noticing urinary urgency but nil else. On Tecfidera. | 39 | Neurology |
| 5 | Recent onset right sided radicular pain, L5 & L4 dermatomes, possibly for intervention. | 71 | Anaesthesia |
| 6 | Known IBD. Working as hairdresser and frequent heavy lifting. Complains of lower back pain which occurs in intermittent flare ups. Query sacroiliitis vs back pain secondary to degenerative disc disease. | 30 | Gastroenterology |
| 7 | Bilateral leg pain. | 58 | Orthopaedics |
| 8 | LBP, bilateral sciatica in S1 distribution, 15 month history, no resolution with physiotherapy, normal neuro exam. | 34 | Orthopaedics |
| 9 | Persistent pain. | 33 | Orthopaedics |
| 10 | LBP, bilateral sciatica L5 distribution > 1 year, also I/M foot numbness, ? spinal cause, also pain ++ at greater trochanter, ? trochanteric bursitis. | 71 | Orthopaedics |
| 11 | MRI with gadolinium contrast please, previous L4/5 discectomy, previous benefit from L4 transforaminal injection. | 47 | Orthopaedics |
| 12 | Post lumbar decompression and interspinous spacer insertion, recurrent symptoms, query recurrent stenosis. | 59 | Orthopaedics |
| 13 | Mild weakness S2 and L1 /2 myotomes. | 46 | Orthopaedics |
| 14 | Radicular symptoms left lower limb. Lumbar disc prolapse. | 38 | Orthopaedics |
| 15 | Left sided radicular pain, reduced saddle sensation on left. Reports urinary incontinence. ? Disc versus impending cauda equina. | 43 | Orthopaedics |
| 16 | LBP for 6 years, constant, no response to conservative measures. Normal exam, ? disease amenable to injection therapy. | 47 | Orthopaedics |
| 17 | Poor exercise tolerance, leg giving way, non specific low back pain, hip x-ray reassuring. | 54 | Anaesthesia |
| 18 | New onset right foot drop. XR lumbar spine only revealed mild joint space narrowing at L4/5. Please perform outpatient MRI to further assess. Of note, patient is of no fixed abode, so please contact patient with appointment details via mobile. | 46 | Neurology |
| 19 | B/L sciatica on BGR of chronic LBP with associated degenerative scoliosis and arthritic changes. Need MRI to access if there is a genuine surgical target as guided injections are no longer providing relief. | 66 | Orthopaedics |
| 20 | Right lower limb pain. | 25 | Orthopaedics |

**Appendix**
